# Supplementary material for: Caregiver acceptability of the guidelines for managing young infants with possible serious bacterial infections (PSBI) in primary care facilities in rural Bangladesh
Source: PubMed Central journal article supplement (PMC7156040; doi:10.1371/journal.pone.0231490), 2020-04-14
Supplement: pone.0231490.s001.pdf [file pone.0231490.s001.pdf]

| <b>Levels of influence</b> | <b>Description</b>                                                                                                                 | <b>Constructs explored in the interviews</b>                                                                                                                                          |
|----------------------------|------------------------------------------------------------------------------------------------------------------------------------|---------------------------------------------------------------------------------------------------------------------------------------------------------------------------------------|
| Individual                 | Factors related to the caregivers' knowledge and perception of care provided per the guidelines including antibiotics and referral | Caregiver autonomy in decision-making to seek care and accept referral; caregiver perception of illness severity; previous experiences with care at public sector facilities          |
| Interpersonal              | The role and influence household factors and other key actors in healthcare decision-making                                        | Influence of economic factors, household responsibilities, and family members in decision-making for the infant's care (e.g., husband, mother or mother-in-law, other family members) |
| Organizational             | Care received at public sector health facility and relationship with providers                                                     | Availability and accessibility of public sector services and medicines; Caregiver relationship with the provider; Provider motivation to facilitate referral and follow-up            |
| Community                  | Social and cultural values that motivate or impede acceptability of treatment per the guidelines                                   | Social and cultural values that influence care-seeking in this context; community perceptions of public sector care                                                                   |
